# Supplementary material for: How does the environment affect fighting? The interaction between extrinsic fighting ability and resource value during contests
Source: Oxford University Press journal article supplement (doi:10.1242/jeb.187740), 2018-01-01
Supplement: jeb187740supp.pdf [file jeb187740supp.pdf]

**Table S1** Sample sizes for each treatment combination

| Focal RHP | Opponent RHP | Resource Value | No. pairs |
|-----------|--------------|----------------|-----------|
| Hypoxic   | Normoxic     | Flow           | 7         |
| Hypoxic   | Normoxic     | No Flow        | 8         |
| Normoxic  | Hypoxic      | Flow           | 7         |
| Normoxic  | Hypoxic      | No Flow        | 9         |
| Hypoxic   | Hypoxic      | Flow           | 8         |
| Hypoxic   | Hypoxic      | No Flow        | 8         |
| Normoxic  | Normoxic     | Flow           | 8         |
| Normoxic  | Normoxic     | No Flow        | 11        |
|           |              | <i>N</i> =     | 66        |

**Table S2** Significance test from general linear models (GLMs) examining the effects of relative size difference and relative nematocyst length (escalated fights only) on contest dynamics.

| <b>Relative size difference</b>   |          |    |         |
|-----------------------------------|----------|----|---------|
| Response variable                 | $\chi^2$ | df | P-value |
| Likelihood of escalation          | 0.45     | 1  | 0.502   |
| Focal outcome                     | 0.60     | 1  | 0.438   |
| Attack type                       | 1.22     | 1  | 0.270   |
| Likelihood of focal attack        | 1.66     | 1  | 0.198   |
| No. peels inflicted by focal      | 0.12     | 1  | 0.905   |
| Contest duration                  | 0.14     | 1  | 0.681   |
| <b>Relative nematocyst length</b> |          |    |         |
| Response variable                 | $\chi^2$ | df | P-value |
| Focal outcome                     | 2.72     | 1  | 0.10    |
| Attack type                       | 1.07     | 1  | 0.31    |
| Likelihood of focal attack        | 0.65     | 1  | 0.42    |
| No. peels inflicted by focal      | 6.82     | 1  | 0.38    |

**Table S3** Significance test from the general linear model (GLM) to examine the effect of focal RHP, opponent RHP and resource value (RV) on the likelihood of the focal individual inflicting an attack. Marginally significant effects are printed in italics.

| Effect                    | $\chi^2$    | df       | P-value      |
|---------------------------|-------------|----------|--------------|
| Focal RHP*Opponent RHP*RV | 0.12        | 1        | 0.733        |
| Focal RHP*RV              | 0.84        | 1        | 0.361        |
| <i>Opponent RHP*RV</i>    | <i>3.65</i> | <i>1</i> | <i>0.056</i> |
| RV                        | 1.46        | 1        | 0.227        |
| Focal RHP*Opponent RHP    | 0.84        | 1        | 0.358        |
| Opponent RHP              | 0.33        | 1        | 0.567        |
| Focal RHP                 | 2.72        | 1        | 0.099        |

**Table S4** Significance test from the general linear model (GLM) to examine the effect of focal RHP, opponent RHP and resource value (RV) on the number of peels inflicted by the focal individual. Significant effects are printed in bold.

| Effect                        | $\chi^2$     | df       | P-value      |
|-------------------------------|--------------|----------|--------------|
| Focal RHP*Opponent RHP*RV     | 7.96         | 1        | 0.274        |
| Focal RHP*RV                  | 2.40         | 1        | 0.549        |
| Opponent RHP*RV               | 7.60         | 1        | 0.274        |
| <b>Focal RHP*Opponent RHP</b> | <b>42.11</b> | <b>1</b> | <b>0.010</b> |
| RV                            | 3.01         | 1        | 0.491        |
